# Supplementary material for: Synthesis, characterization and adsorption properties of an amide-modified hyper-cross-linked resin
Source: Royal Society of Chemistry journal article supplement (doi:10.1039/c4ra07322c), 2014-01-01

### Scheme S1 Synthetic procedure for HCP-EDA-AA

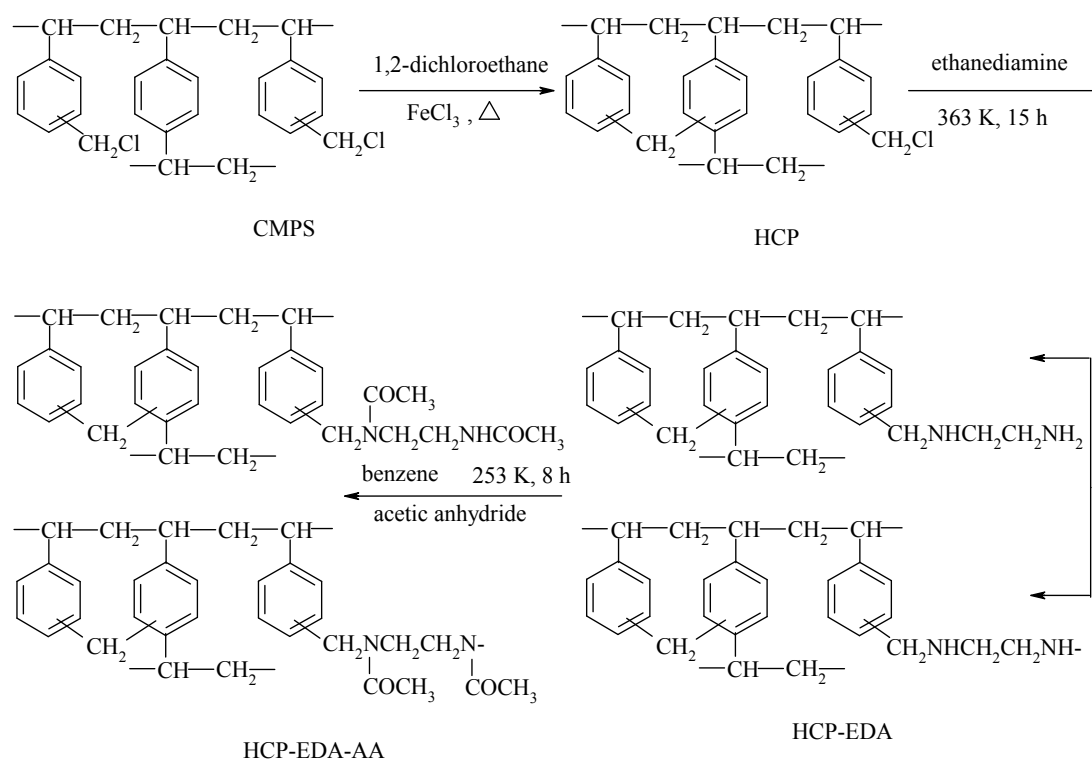

Fig. S1. The adsorption isotherm of phenol on HCP-EDA-AA, HJ-Z01, HCP and the ethylenediamine-modified hyper-cross-linked resin HCP-EDA.

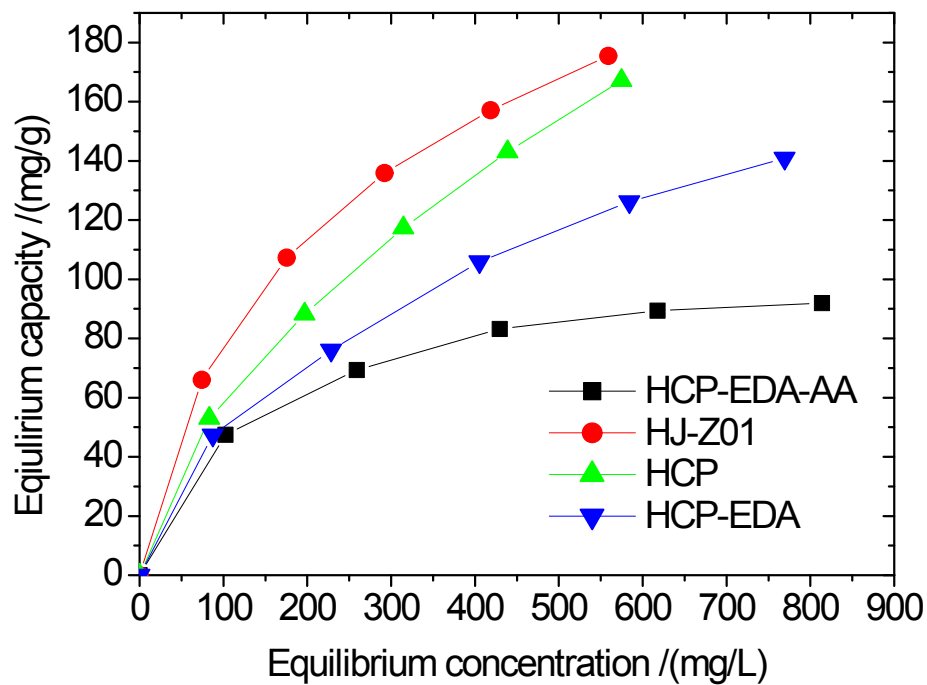

Supplement: c4ra07322c1.pdf [file c4ra07322c1.pdf]
